# Supplementary material
Source: PubMed Central journal article supplement (PMC3000634)

# Supporting Information

On the performance of Spin Diffusion NMR Techniques in Oriented  
Solids: Prospects for Resonance Assignments and Distance  
Measurements from Separated Local Field Experiments

*Nathaniel J. Traaseth<sup>2</sup>, T. Gopinath<sup>2</sup>, and Gianluigi Veglia<sup>1,2\*</sup>*

<sup>1</sup> *Department of Chemistry University of Minnesota, Minneapolis, Minnesota 55455*

<sup>2</sup> *Department of Biochemistry, Molecular Biology, and Biophysics, University of  
Minnesota, Minneapolis, Minnesota 55455*

*\*Author for correspondence*

## SUPPORTING INFORMATION TABLE I

Homo and heteronuclear dipolar couplings (in Hz) used in the simulation shown in **Figure 13**.

| <b>Atom</b> | <b>H1</b> | <b>H2</b> | <b>H3</b> | <b>H4</b> | <b>H5</b> | <b>H6</b> | <b>H7</b> | <b>H8</b> | <b>H9</b> | <b>H10</b> | <b>N2</b> |
|-------------|-----------|-----------|-----------|-----------|-----------|-----------|-----------|-----------|-----------|------------|-----------|
| <b>N1</b>   | -913.8    | 127.2     | 298.1     | -149      | -5544.2   | -38.7     | -31.0     | -107.0    | -90.7     | -29.6      | 3.2       |
| <b>H1</b>   |           | -2290.5   | -1002.9   | -2182.1   | 4034.6    | 1087.7    | 508.6     | 1426.8    | 3580.8    | 380.4      | -60.7     |
| <b>H2</b>   |           |           | -2108.1   | 395.9     | -309.8    | 474.2     | 137.4     | 172.4     | 513.7     | 214.5      | -38.1     |
| <b>H3</b>   |           |           |           | 7126.0    | -39.1     | 374.6     | 212.0     | 999.8     | 340.0     | 670.8      | -64.9     |
| <b>H4</b>   |           |           |           |           | 1579.2    | 1523.2    | 463.4     | 1823.6    | 344.4     | 1891.6     | -270.6    |
| <b>H5</b>   |           |           |           |           |           | 275.2     | 209.4     | 703.8     | 521.4     | 262.8      | -27.4     |
| <b>H6</b>   |           |           |           |           |           |           | -3159.1   | 1250.4    | 6265.5    | -2268.0    | 652.5     |
| <b>H7</b>   |           |           |           |           |           |           |           | 2986.4    | 1524.9    | -996.0     | 125.3     |
| <b>H8</b>   |           |           |           |           |           |           |           |           | -3950.5   | 885.8      | -113.0    |
| <b>H9</b>   |           |           |           |           |           |           |           |           |           | -725.4     | 78.6      |
| <b>H10</b>  |           |           |           |           |           |           |           |           |           |            | 4525.7    |

## SUPPORTING INFORMATION FIGURE 1

PDSB experiments on the NAL single crystal. All 12 cross-peaks are shown from the spectra as expressed as the cross-peak intensity ( $Int_c$ ) divided by diagonal peak intensities ( $Int_d$ ). Note that the maximum value along the y-axis is 0.2, corresponding to a 20% transfer efficiency.

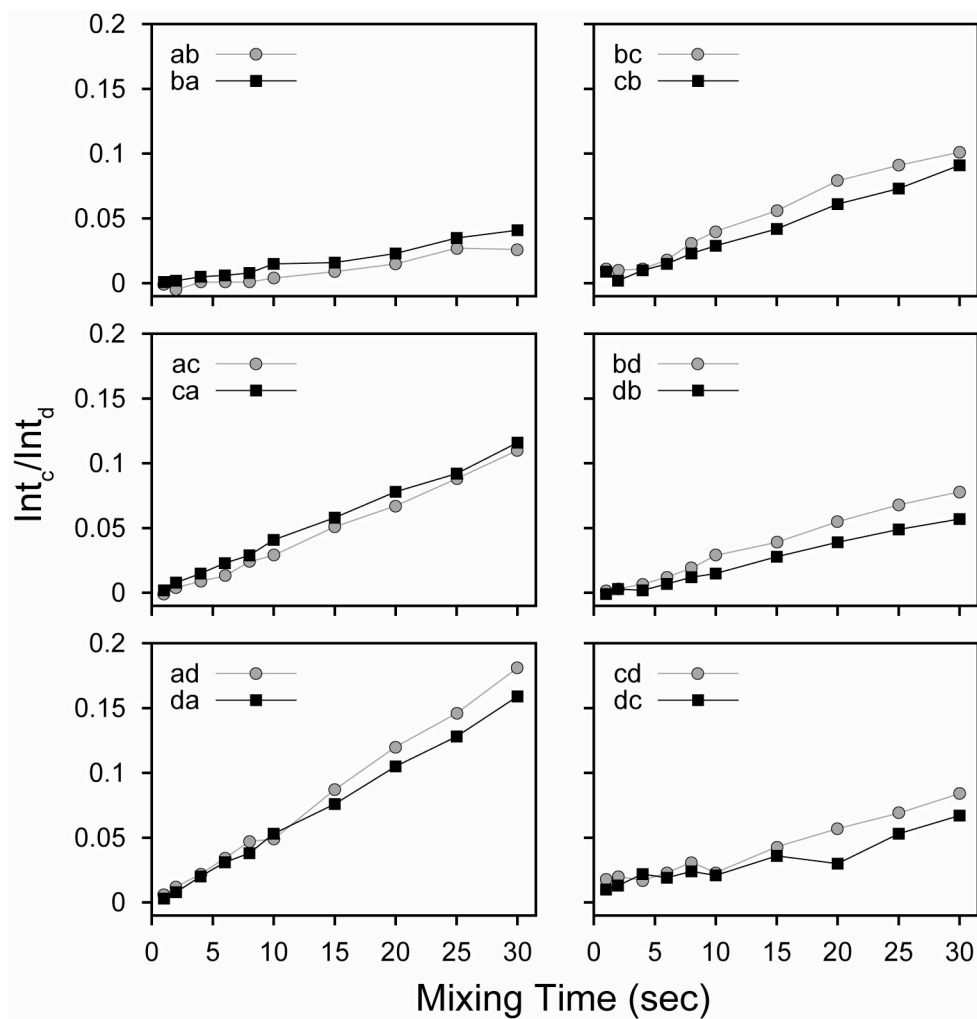

## SUPPORTING INFORMATION FIGURE 2

PDSD experiments on the NAVL single crystal. All 12 cross-peaks are shown from the spectra as expressed as the cross-peak intensity ( $Int_c$ ) divided by diagonal peak intensities ( $Int_d$ ).

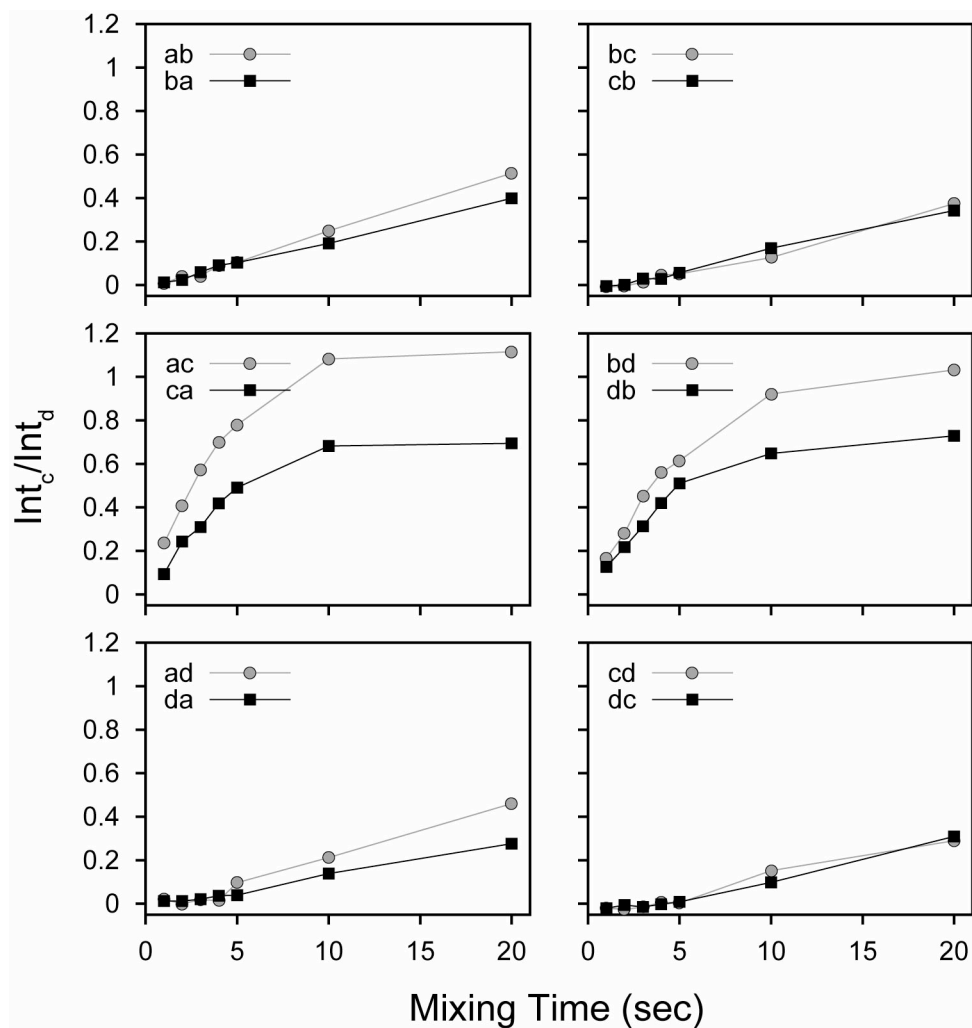

### SUPPORTING INFORMATION FIGURE 3

PMPT experiments on the NAL single crystal. The  $^1\text{H}$  RF amplitude was varied between 0-70 kHz for three different  $^{15}\text{N}$  spinlocks (21, 37.5, and 52.5 kHz). The mixing time was fixed at 10 msec for all points. Cross-peak intensities are plotted in arbitrary units. The dip in the curves is due to the Hartmann-Hahn match.

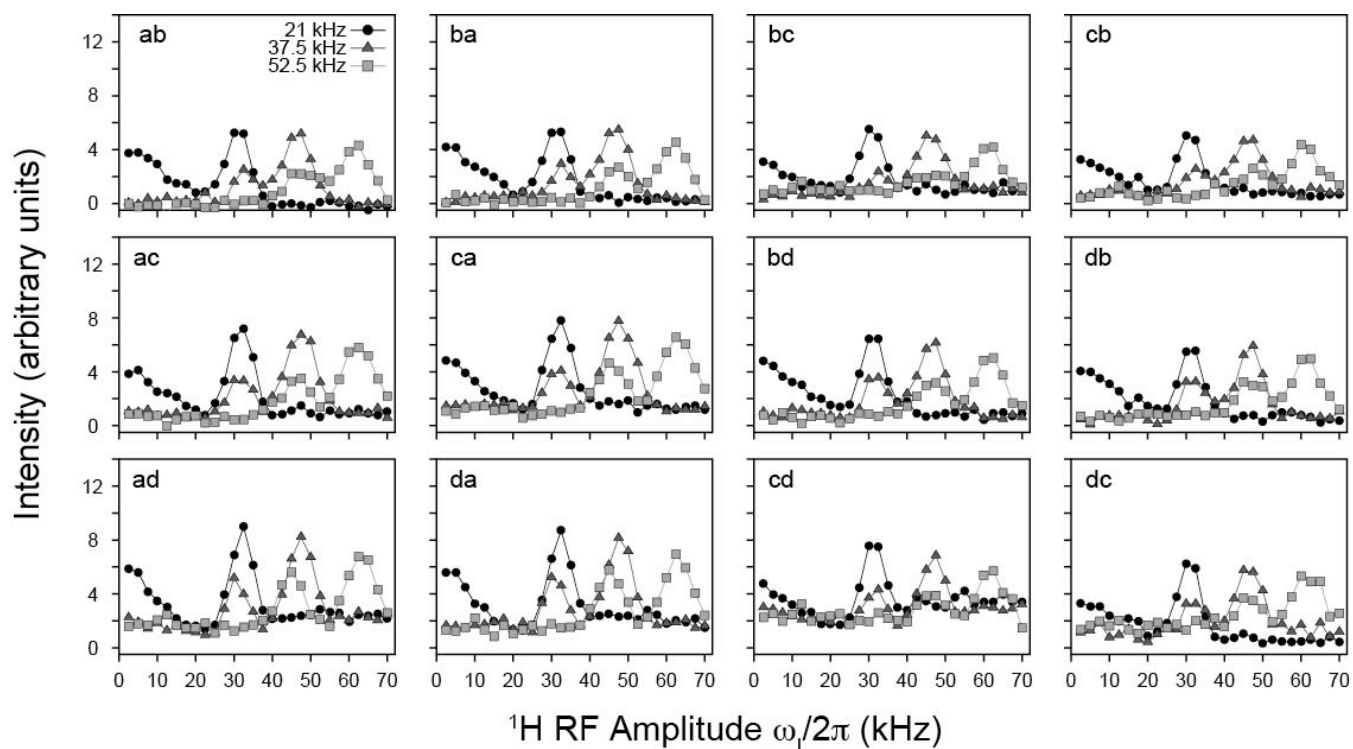

## SUPPORTING INFORMATION FIGURE 4

Same as **Supporting Information Figure 3**, except that the  $^1\text{H}$  RF amplitude is plotted in units of percentage mismatch from that of the  $^{15}\text{N}$  RF amplitude.

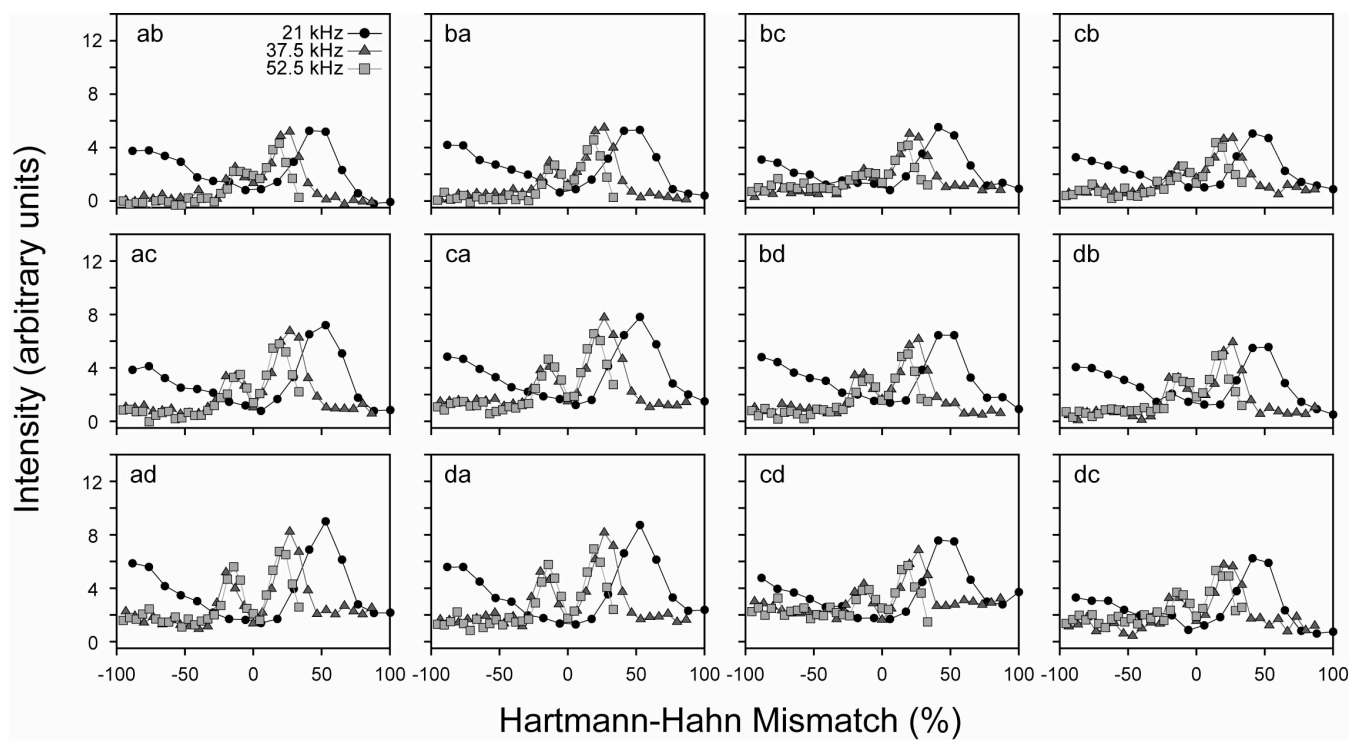

## SUPPORTING INFORMATION FIGURE 5

PMPT experiments on the NAVL single crystal. The  $^1\text{H}$  RF amplitude was varied for a  $^{15}\text{N}$  spinlock of 57.5 kHz. The mixing time was fixed at 10 msec for all points. Cross-peak intensities are plotted in arbitrary units. The dip in the curves is due to the Hartmann-Hahn match.

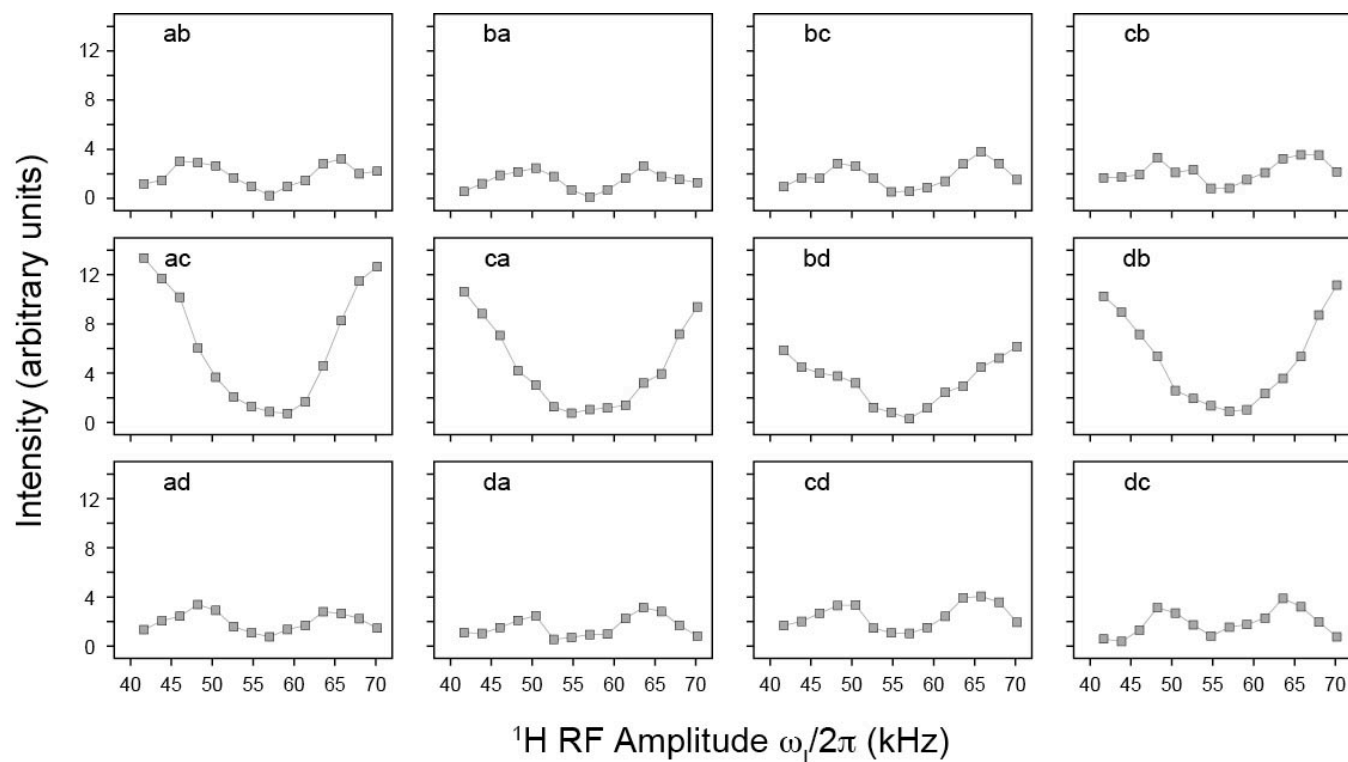

## SUPPORTING INFORMATION FIGURE 6

Same as **Supporting Information Figure 5**, except that the  $^1\text{H}$  field is plotted in units of percentage mismatch from that of the  $^{15}\text{N}$  RF amplitude (57.5 kHz).

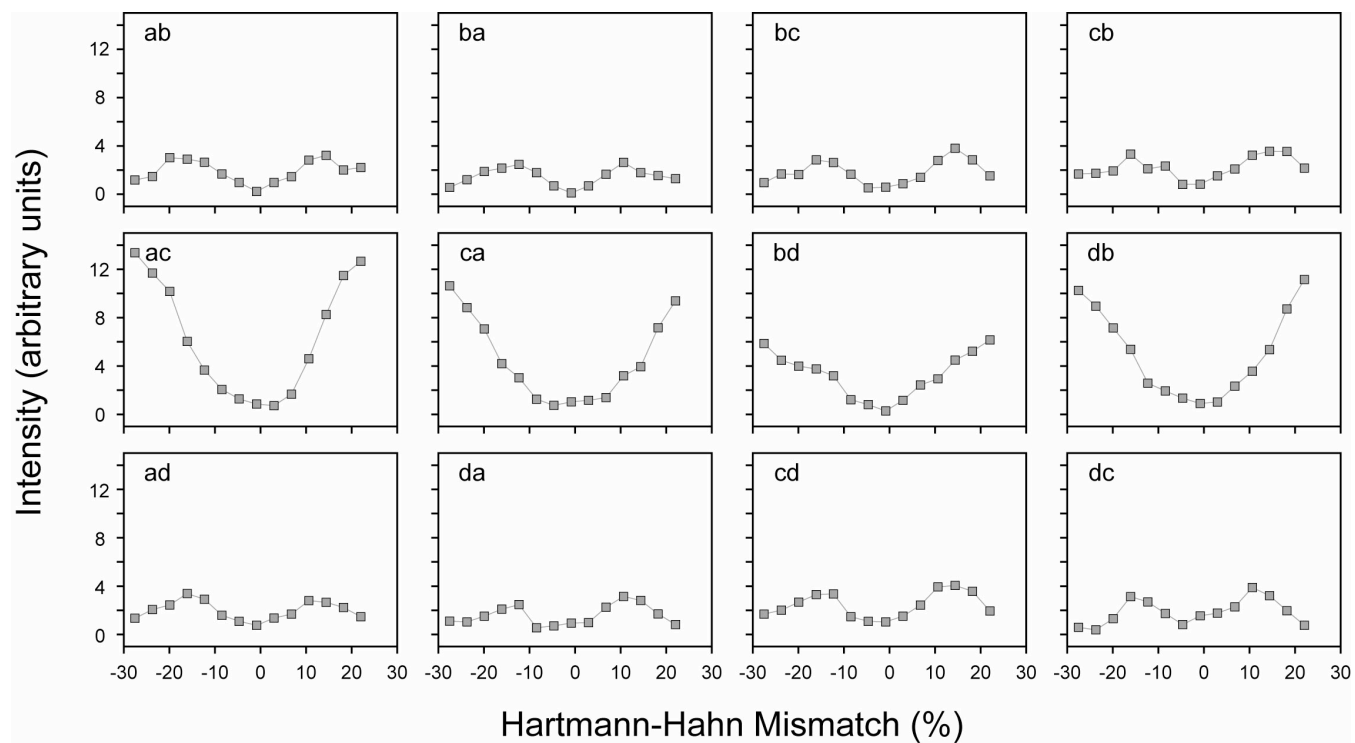

Supplement: NIHMS244566-supplement-1_si_001.pdf [file NIHMS244566-supplement-1_si_001.pdf]
